# Supplementary material for: Curcumin loaded zinc oxide nanoparticles for activity-enhanced antibacterial and anticancer applications
Source: PubMed Central journal article supplement — RSC Adv. 2020 Aug 19;10(51):30785–95. doi: 10.1039/d0ra05755j (PMC9056367; doi:10.1039/d0ra05755j), 2020-08-19
Supplement: RA-010-D0RA05755J-s001.pdf [file RA-010-D0RA05755J-s001.pdf]

## Supplementary Information

### Curcumin loaded zinc oxide nanoparticles for activity-enhanced antibacterial and anticancer applications

W. P. T. D. Perera, <sup>a,b</sup> D. M. R. K. Dissanayake, <sup>b,c\*</sup> U. I. Ranatunga, <sup>d</sup> N. M. Hettiarachchi, <sup>a,b</sup> K. D. C. Perera, <sup>a,b</sup> J.M. Unagolla, <sup>e</sup> R. T. DeSilva, <sup>b</sup> and L. R. Pahalagedara <sup>b</sup>

<sup>a.</sup> Academy of the Sri Lanka Institute of Nanotechnology, Nanotechnology and Science Park, Mahenwatte, Pitipana, Homagama 10206, Sri Lanka.

<sup>b.</sup> Sri Lanka Institute of Nanotechnology, Nanotechnology and Science Park, Mahenwatte, Pitipana, Homagama 10206, Sri Lanka.

<sup>c.</sup> Department of Pharmacy and Pharmaceutical Sciences, Faculty of Allied Health Sciences, University of Sri Jayewardenepura, Gangodawila, Nugegoda 10250, Sri Lanka.

<sup>d.</sup> Department of Biochemistry and Molecular Biology, Faculty of Medicine, University of Colombo, 25 Kynsey Road, Colombo 00800, Sri Lanka.

<sup>e.</sup> Biomedical Engineering Program, Department of Bioengineering, College of Engineering, University of Toledo, Toledo, OH 43607, USA

\* Corresponding author (email: rangad@sjp.ac.lk )

#### 1. Loading study

The calibration curve for the quantification of curcumin is presented below, alongside the raw UV-Vis data used for its construction. Linear correlation between concentration and absorbance was shown between 1–9 ppm of curcumin solution.

**Figure S1- A) UV-Vis spectra used to plot the calibration curve in B).**

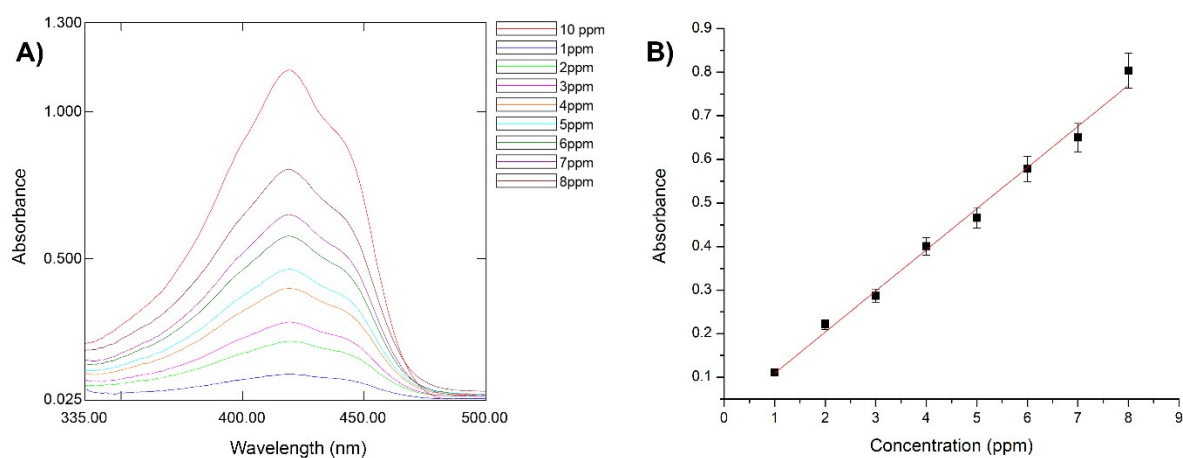

**Table S1-** Calculated concentrations of curcumin in post-digestion solutions of polymorphic ZnO-curcumin nanocomposites.

| Nanocomposite shape | Curcumin concentration ( $\mu\text{g mL}^{-1}$ ) | Loading (%) |
|---------------------|--------------------------------------------------|-------------|
| Rod                 | 26.6                                             | 3.93        |
| Sphere              | 52.0                                             | 5.72        |
| Long petal          | 102                                              | 10.25       |
| Short petal         | 28.5                                             | 3.14        |
| Javelin             | 75.7                                             | 8.37        |

The highest loading of curcumin was observed in LPZNP-C, while the lowest was observed in SPZNP-C. This pattern largely matches that observed in the calculated, TGA-derived data (see Table 1), likely due to the same reasons discussed previously (*i.e.*- large surface areas with deep crevices in the case of LPZNPs and relatively low surface area-to-volume ratio in the case of the SZNPs).

## **2. Anticancer assay**

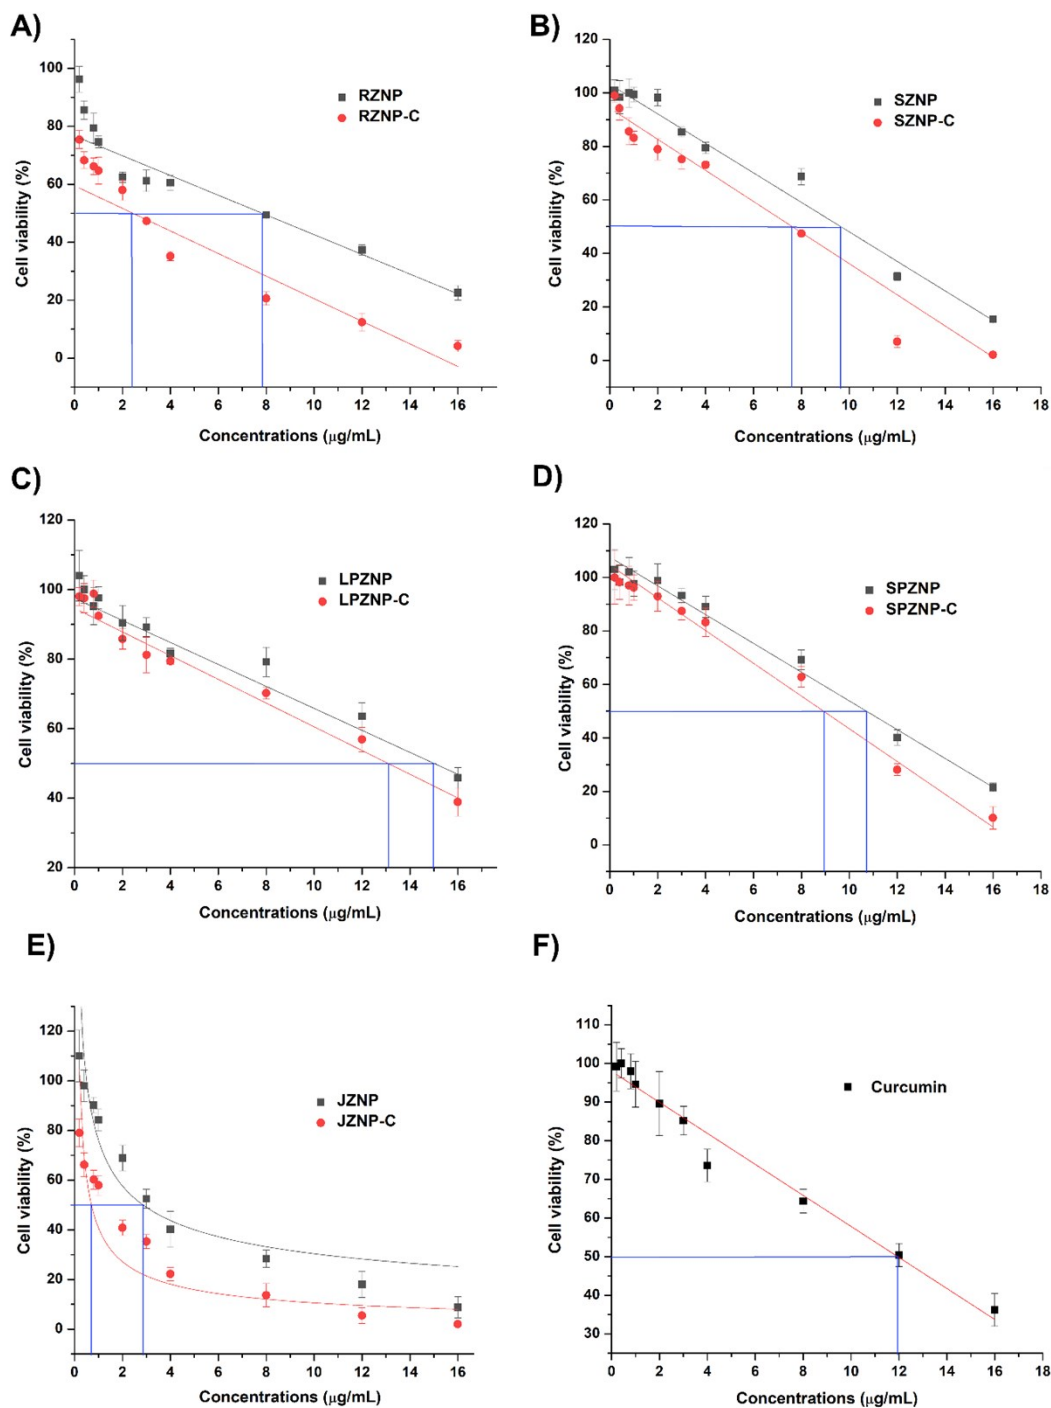

**Figure S2-** Anticancer activity of different shapes of ZNP, curcumin-loaded ZNPs and pure curcumin. **A)** RZNP and RZNP-C, **B)** SZNP and SZNP-C, **C)** LPZNP and LPZNP-C, **D)** SPZNP and SPZNP-C, **E)** JZNP and JZNP-C, **F)** pure curcumin.

### 3. Cytotoxicity study

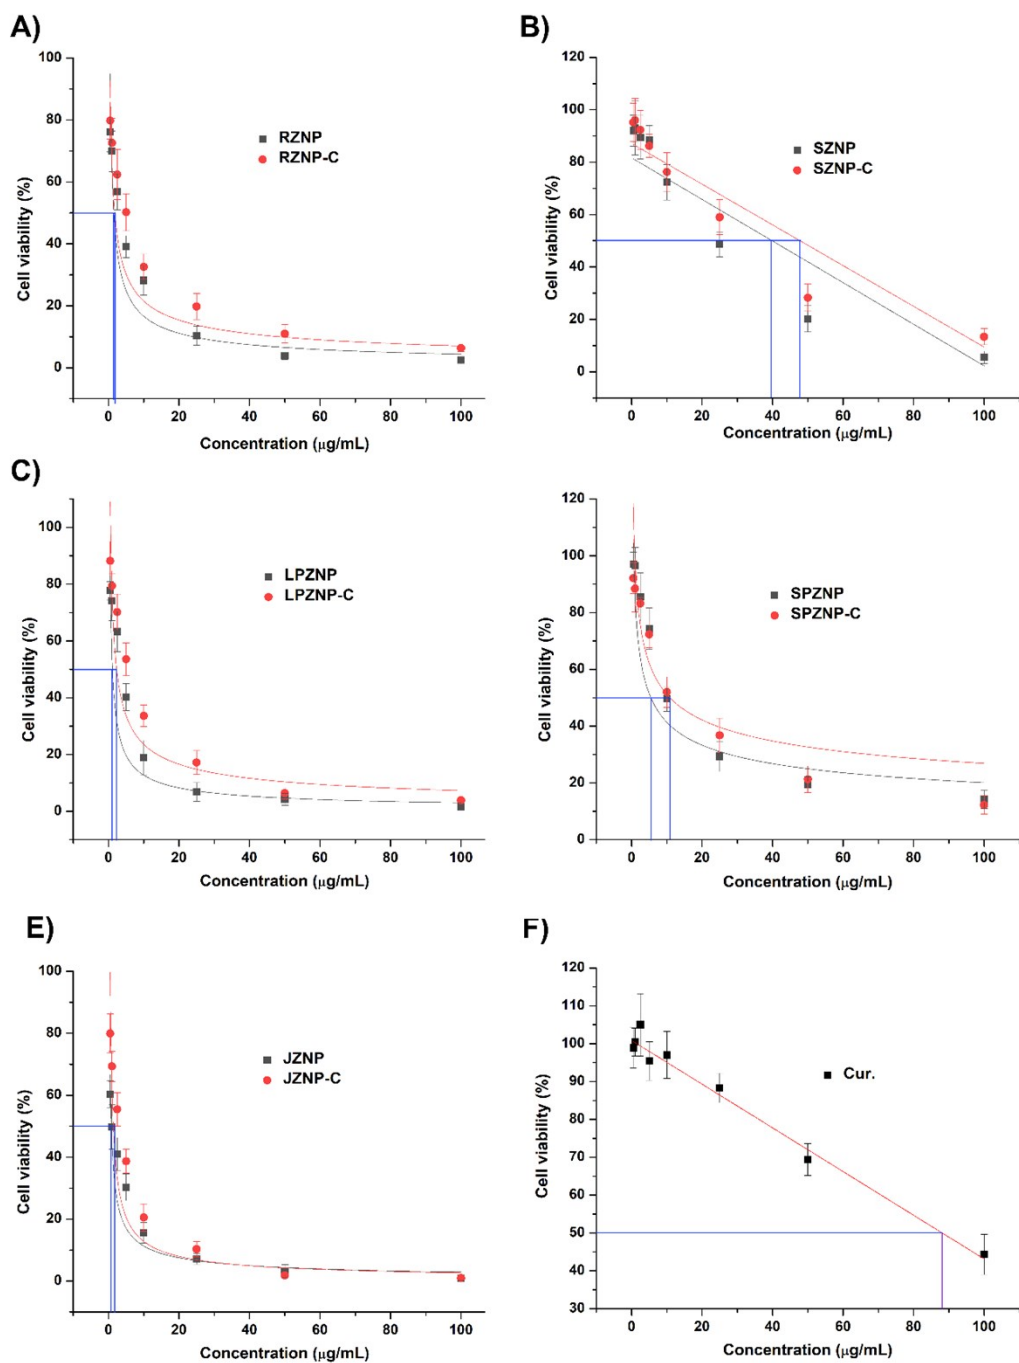

**Figure S3-** Cytotoxicity of different shapes of ZNP, curcumin-loaded ZNPs and pure curcumin towards Human Embryonic Kidney (HEK) cells. **A)** RZNP and RZNP-C, **B)** SZNP and SZNP-C, **C)** LPZNP and LPZNP-C, **D)** SPZNP and SPZNP-C, **E)** JZNP and JZNP-C, **F)** pure curcumin.
